# Supplementary material for: Characterization of Magnitude and Antigen Specificity of HLA-DP, DQ, and DRB3/4/5 Restricted DENV-Specific CD4+ T Cell Responses
Source: Front Immunol. 2019 Jul 5;10:1568. doi: 10.3389/fimmu.2019.01568 (PMC6624677; doi:10.3389/fimmu.2019.01568)
Supplement: Supplementary Table S1 — List of the peptides tested in Sri Lanka population for HLA class II studies. The number of peptides is shown per each allele belonging to –DRB3/4/5,-DP, and -DQ, according to DENV protein composition. [file Table_1.XLSX]

## Sheet: Sheet2
	Neutralization Titer (50%)						DENV serology	DENV infection	# of donors	% of DENV seropositive
Subject ID	DENV 1	DENV 2	DENV 3	DENV 4	Serology Conclusion
GS0011	318	59	40	50	Primary DENV1		Seropositive	Primary	35	36.4583
GS0159	185	<40	<40	<40	Primary DENV1			Secondary	61	63.5417
GS0241	63	<40	<40	<40	Primary DENV1		Seronegative	none	24
GS1212	1995	309	331	174	Primary DENV1			Total	120
GS0043	<40	>1280	78	<40	Primary DENV2
GS0046	83	896	70	<40	Primary DENV2
GS0054	<40	658	<40	<40	Primary DENV2
GS0080	<40	526	<40	47	Primary DENV2
GS0122	<20	>1280	<20	<20	Primary DENV2
GS0130	<40	371	<40	<40	Primary DENV2
GS0162	<40	328	<40	<40	Primary DENV2
GS0200	123	890	116	48	Primary DENV2
GS0211	<40	540	<40	<40	Primary DENV2
GS0218	<40	228	<40	<40	Primary DENV2
GS0254	<40	119	<40	<40	Primary DENV2
GS0266	<40	66	<40	<40	Primary DENV2
GS1069	50	>1280	80	200	Primary DENV2
GS1411	< 40	305	< 40	< 40	Primary DENV2
GS1526	50	200	50	20	Primary DENV2
GS1714	< 40	1110	< 40	134	Primary DENV2
GS0201	<40	<40	820	<40	Primary DENV3
GS0227	<40	141	732	59	Primary DENV3
GS0229	47	111	1083	<40	Primary DENV3
GS0252	<40	<40	892	<40	Primary DENV3
GS0263	<40	<40	273	<40	Primary DENV3
GS0271	22	<40	172	<40	Primary DENV3
GS0421	<40	228	1129	64	Primary DENV3
GS1057	200	200	>1280	200	Primary DENV3
GS1412	50	50	>1280	50	Primary DENV3
GS1546	50	50	200	50	Primary DENV3
GS1556	< 40	< 40	370	< 40	Primary DENV3
GS1624	126	132	1113	< 40	Primary DENV3
GS1766	52	77	1698	< 40	Primary DENV3
GS1490	50	200	<40	>1280	Primary DENV4
GS1536	200	200	200	800	Primary DENV4
GS0044	440	>1280	669	68	Secondary DENV
GS0062	988	>1280	>1280	<40	Secondary DENV
GS0102	90	130	104	141	Secondary DENV
GS0103	221	141	145	335	Secondary DENV
GS0104	602	77	490	173	Secondary DENV
GS0128	>1280	346	>1280	81	Secondary DENV
GS0137	774	385	456	209	Secondary DENV
GS0141	866	354	209	354	Secondary DENV
GS0142	284	326	107	326	Secondary DENV
GS0156	>1280	554	469	345	Secondary DENV
GS0167	842	>1280	712	732	Secondary DENV
GS0173	52	443	732	104	Secondary DENV
GS0417	52	408	214	74	Secondary DENV
GS0452	66	151	107	69	Secondary DENV
GS0462	63	309	105	71	Secondary DENV
GS0466	<40	195	263	<40	Secondary DENV
GS0928	< 40	< 40	53	134	Secondary DENV
GS0929	134	674	235	266	Secondary DENV
GS0930	116	168	610	61	Secondary DENV
GS0972	1280	>1280	800	800	Secondary DENV
GS1012	>1280	>1280	>1280	800	Secondary DENV
GS1013	>1280	800	<40	<40	Secondary DENV
GS1038	301	720	1007	149	Secondary DENV
GS1044	>1280	>1280	800	800	Secondary DENV
GS1045	800	>1280	>1280	800	Secondary DENV
GS1058	800	800	200	>1280	Secondary DENV
GS1059	800	320	>1280	800	Secondary DENV
GS1062	200	200	<40	<40	Secondary DENV
GS1063	80	80	200	50	Secondary DENV
GS1226	800	>1280	200	800	Secondary DENV
GS1422	800	>1280	200	200	Secondary DENV
GS1545	800	>1280	>1280	800	Secondary DENV
GS1549	>1280	>1280	>1280	800	Secondary DENV
GS1550	800	>1280	800	200	Secondary DENV
GS1557	800	>1280	>1280	200	Secondary DENV
GS1580	800	800	200	800	Secondary DENV
GS1617	1196	2743	2517	1478	Secondary DENV
GS1618	68	130	1671	275	Secondary DENV
GS1619	118	640	762	180	Secondary DENV
GS1644	1269	1246	595	65	Secondary DENV
GS1646	< 40	51	68	185	Secondary DENV
GS1661	442	413	1023	599	Secondary DENV
GS1677	467	133	142	874	Secondary DENV
GS1691	692	401	257	154	Secondary DENV
GS1692	2333	2244	1164	800	Secondary DENV
GS1697	876	467	NA	689	Secondary DENV
GS1704	195	508	91	88	Secondary DENV
GS1708	215	333	136	123	Secondary DENV
GS1710	1218	1741	1372	722	Secondary DENV
GS1720	233	832	678	137	Secondary DENV
GS1730	656	1652	1646	217	Secondary DENV
GS1739	125	531	225	429	Secondary DENV
GS1740	722	882	1181	80	Secondary DENV
GS1751	1228	1769	486	644	Secondary DENV
GS1754	1758	1217	789	402	Secondary DENV
GS1757	510	1495	3091	328	Secondary DENV
GS1771	1379	1317	1182	4168	Secondary DENV
GS1772	562	1740	NA	234	Secondary DENV
GS1773	565	656	623	547	Secondary DENV
GS1781	NA	659	420	76	Secondary DENV
GS1784	1634	1211	1103	510	Secondary DENV
GS0094	<40	<40	<40	<40	Seronegative
GS0118	<40	<40	<40	<40	Seronegative
GS0136	< 40	< 40	< 40	< 40	Seronegative
GS0174	<40	<40	<40	<40	Seronegative
GS0242	<40	<40	<40	<40	Seronegative
GS0934	< 40	< 40	< 40	< 40	Seronegative
GS0973	< 40	< 40	< 40	< 40	Seronegative
GS1082	< 40	< 40	< 40	< 40	Seronegative
GS1151	<40	<40	<40	<40	Seronegative
GS1407	< 40	< 40	< 40	< 40	Seronegative
GS1486	< 40	< 40	< 40	< 40	Seronegative
GS1530	< 40	< 40	< 40	< 40	Seronegative
GS1541	< 40	< 40	< 40	< 40	Seronegative
GS1566	< 40	< 40	< 40	<40	Seronegative
GS1632	< 40	< 40	< 40	< 40	Seronegative
GS1649	< 40	< 40	< 40	< 40	Seronegative
GS1660	< 40	< 40	< 40	< 40	Seronegative
GS1776	< 40	< 40	< 40	< 40	Seronegative
GS1779	< 40	< 40	< 40	< 40	Seronegative
GS1780	< 40	< 40	< 40	< 40	Seronegative
GS1872	< 40	< 40	< 40	< 40	Seronegative
GS1878	< 40	< 40	< 40	< 40	Seronegative
GS1879	< 40	< 40	< 40	< 40	Seronegative
GS1910	< 40	< 40	< 40	< 40	Seronegative
